# Supplementary material for: Efficacy and Safety of the Genistein Nutraceutical Product Containing Vitamin E, Vitamin B3, and Ceramide on Skin Health in Postmenopausal Women: A Randomized, Double-Blind, Placebo-Controlled Clinical Trial
Source: MDPI journal article supplement (doi:10.3390/jcm12041326), 2023-02-07
Supplement: s1 [file s1]

**Table S1.** Participants' satisfaction with the product

| Parameters                                                   | Intention-to-treat Analysis |                       |                 | Per-protocol Analysis |                       |                 |
|--------------------------------------------------------------|-----------------------------|-----------------------|-----------------|-----------------------|-----------------------|-----------------|
|                                                              | GEN Group<br>(n = 25)       | PLA Group<br>(n = 25) | <i>p</i> -Value | GEN Group<br>(n = 23) | PLA Group<br>(n = 22) | <i>p</i> -Value |
| Serum formulation                                            | 9.72 ± 0.54                 | 9.16 ± 1.03           | 0.021           | 9.70 ± 0.56           | 9.18 ± 1.10           | 0.058           |
| Wrinkle reduction                                            | 9.36 ± 0.64                 | 8.56 ± 1.64           | 0.030           | 9.39 ± 0.66           | 8.50 ± 1.74           | 0.033           |
| Hydration                                                    | 9.60 ± 0.58                 | 9.24 ± 1.20           | 0.183           | 9.57 ± 0.59           | 9.23 ± 1.27           | 0.265           |
| Overall efficacy                                             | 9.64 ± 0.57                 | 8.88 ± 1.33           | 0.013           | 9.61 ± 0.58           | 8.86 ± 1.42           | 0.031           |
| Safety profile                                               | 9.64 ± 0.57                 | 9.52 ± 0.77           | 0.534           | 9.61 ± 0.58           | 9.55 ± 0.80           | 0.763           |
| Whether to recommend<br>the product to friends<br>and family | 9.68 ± 0.63                 | 9.20 ± 1.29           | 0.103           | 9.65 ± 0.65           | 9.18 ± 1.37           | 0.154           |
